# Supplementary material
Source: publisher figshare collection journal article supplement (https://acs.figshare.com/ndownloader/files/4023985)
Supplement: Supplementary file 1 [file 4023985]

**Supporting Information for:**

# Rapid, “Step Capture” of Holes in Chloroform During Pulse Radiolysis

*Andrew R. Cook,<sup>\*,†</sup> Matthew J. Bird,<sup>†</sup> Sadayuki Asaoka,<sup>§,#</sup> John R. Miller<sup>\*,†</sup>*

Chemistry Department, Brookhaven National Laboratory, Upton, New York 11793–5000 and  
Chemical Resources Laboratory, Tokyo Institute of Technology, Yokohama, 226–8503, Japan

\* To whom correspondence should be addressed. [acook@bnl.gov](mailto:acook@bnl.gov)

† Chemistry Department, Brookhaven National Laboratory.

§ Chemical Resources Laboratory, Tokyo Institute of Technology.

# Present address: Department of Biomolecular Engineering, Kyoto Institute of Technology,  
Matsugasaki, Sakyo-ku, Kyoto 606-8585, Japan

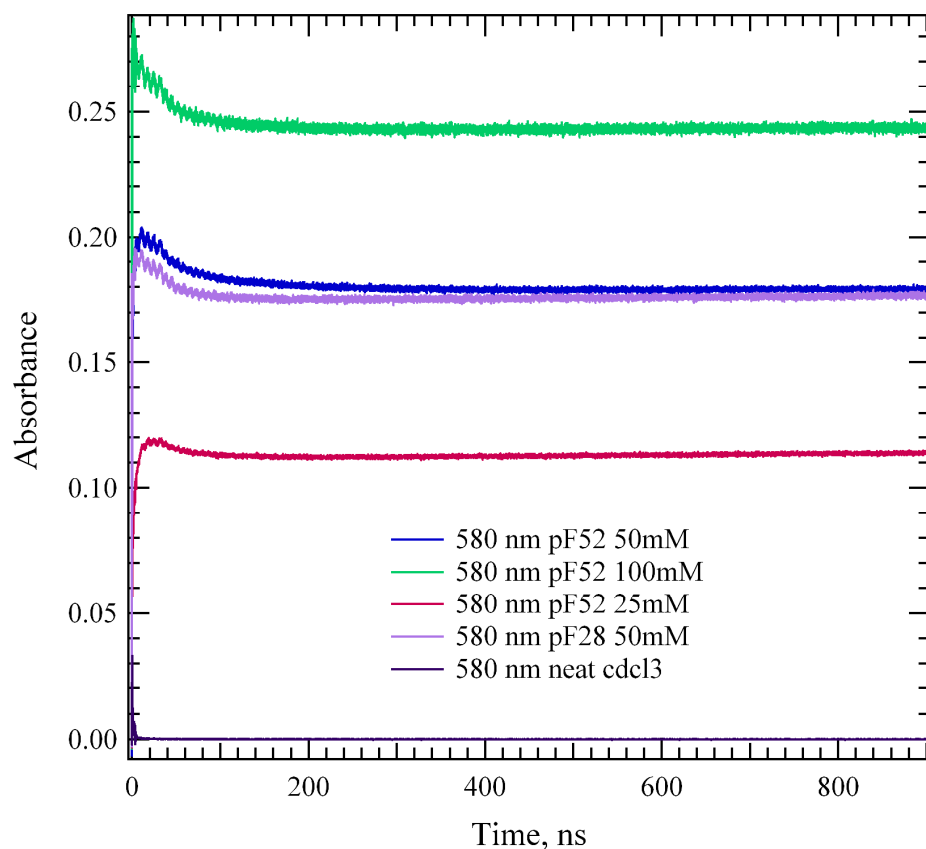

**Figure S1.** Absorptions at 580 nm produced in the first few ns with samples containing pFs do not decay appreciably at times as long as  $\sim 1 \mu\text{s}$ . The species responsible is primarily the  $[\text{pF}^+, \text{Cl}^-]$  ion pair, formed following recombination. The initial decay may be due to an absorption spectral shift or molar extinction coefficient change upon ion-pairing; a fraction may also be due to decay of triplets observed at 780 nm that still weakly absorb at 580 nm.

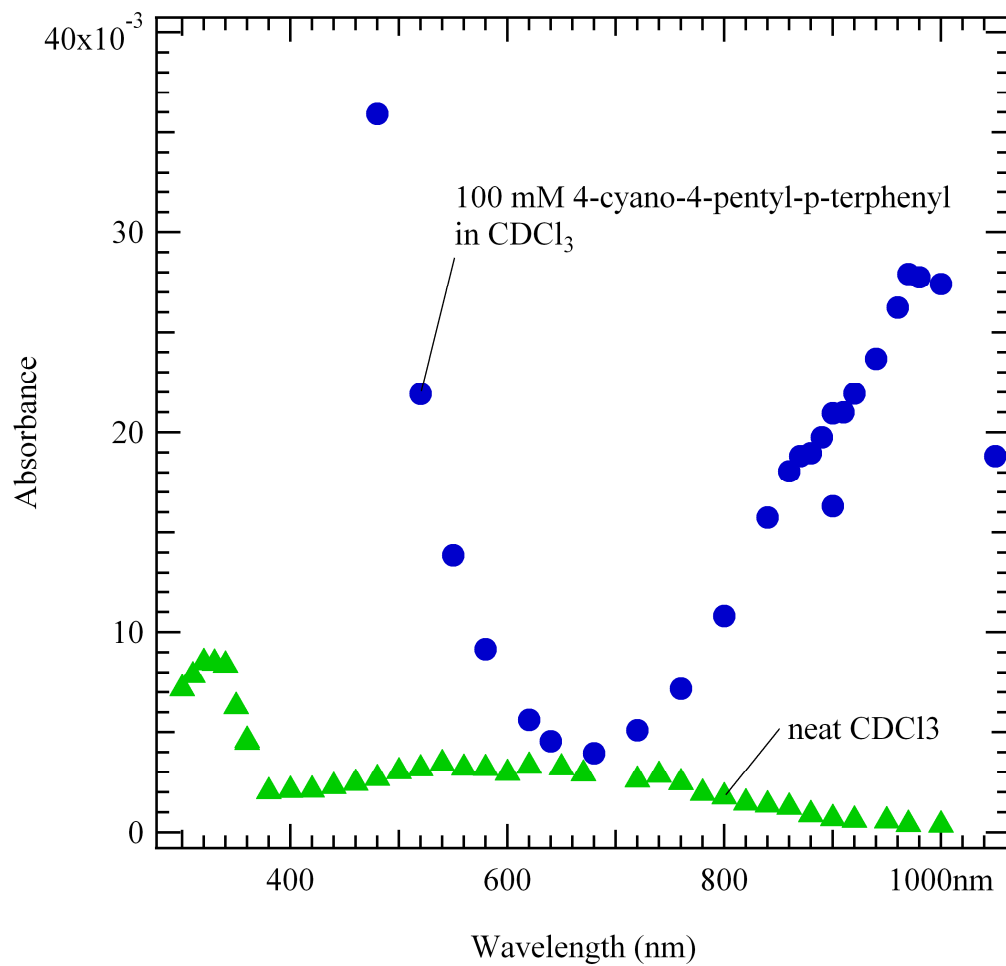

**Figure S2.** Absorption spectrum of 4-pentyl-4''-cyano-p-terphenyl measured in CDCl<sub>3</sub> at 1 ns after radiolysis. The strong and broad absorption is nearly identical to that of p-terphenyl radical; cation, which has a maximum near 965 nm.<sup>42,43</sup>

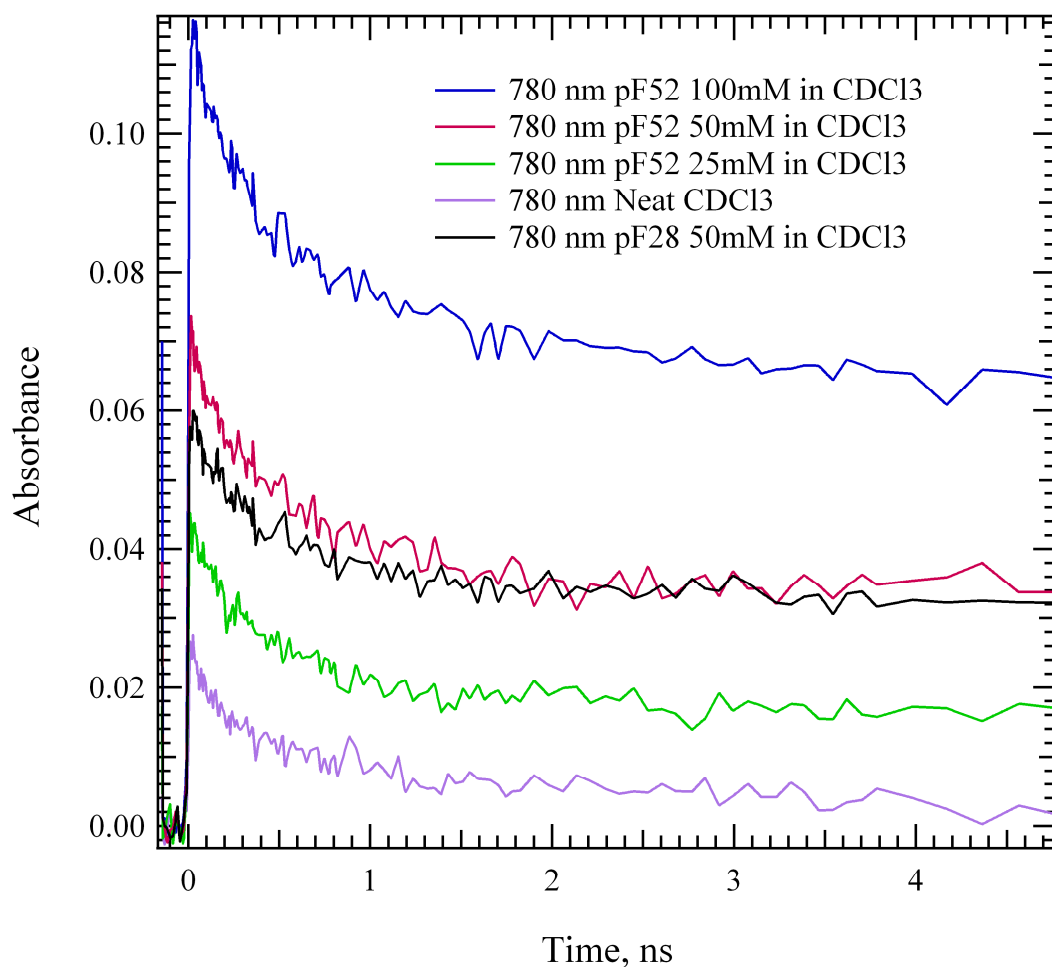

**Figure S3.** Transient absorption at 780 nm, near the peaks of the  $^1\text{pF}^*$  and  $^3\text{pF}^*$  spectra.

Polymer concentrations are in repeat units. Excited states can be produced by Cerenkov absorption, excitation by high energy electrons, and recombination of charges. Observed  $\sim 0.4$  ns decays are consistent with  $^1\text{pF}^*$  decay; the increased non-decaying component with  $[\text{pF}]$  on this timescale is reasonably due to  $^3\text{pF}^*$ .

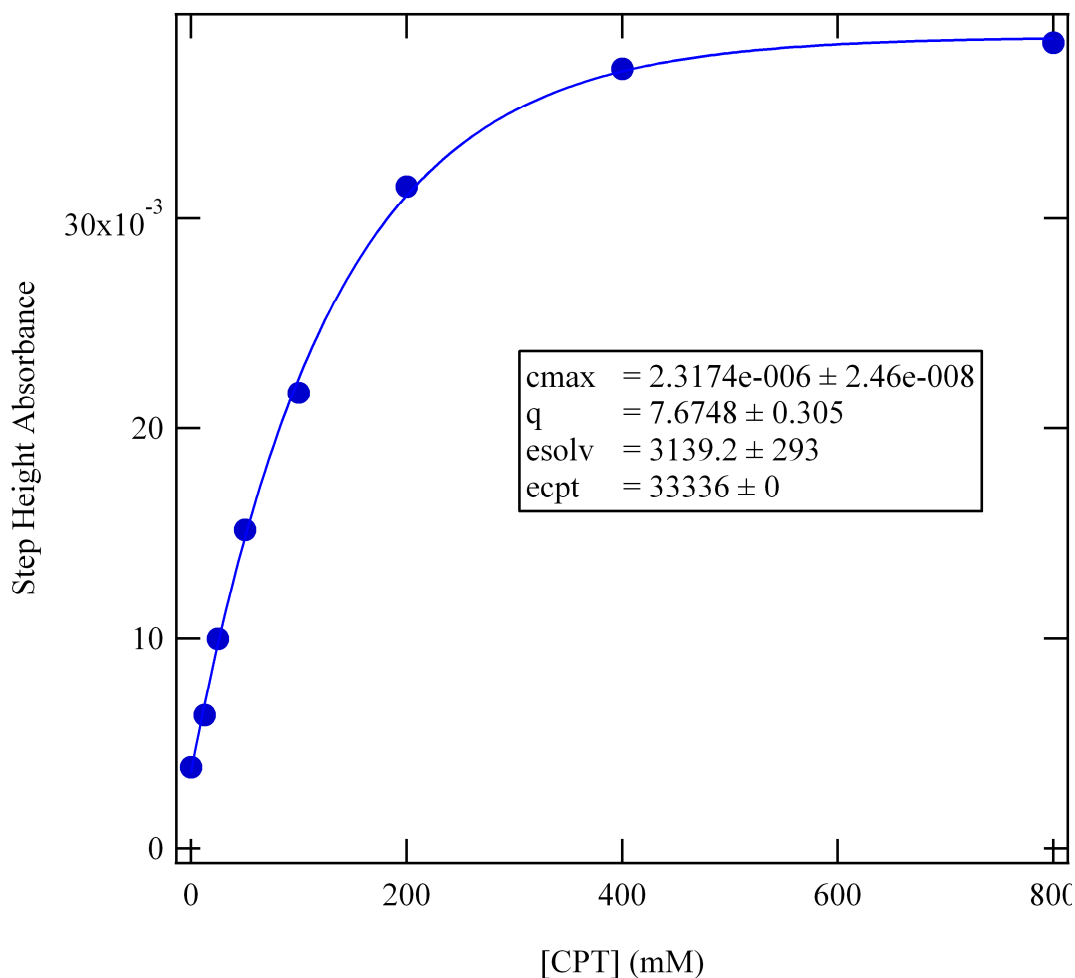

**Figure S4.** Fit to raw step heights measured in varying concentrations of CPT at 900 nm. Fit function explicitly includes contribution of the solvent species:

$$\text{Step height} = c_{\max} \left[ \epsilon_{\text{CPT}} (1 - e^{-qc}) + \epsilon_{\text{solv}} e^{-qc} \right]$$

Where  $c_{\max}$  is the maximum concentration of  $\text{CPT}^{+\bullet}$  that can be formed and is equal to the initial concentration of  $\text{CDCl}_3^{+\bullet}$ ;  $\epsilon_{\text{CPT}} = 39,650 \text{ M}^{-1} \text{ cm}^{-1}$  for  $\text{CPT}^{+\bullet}$  at 965 nm, scaled to 900 nm where the data was collected;  $\epsilon_{\text{solv}}$  is the extinction coefficient of the solvent species at 900 nm,  $q$  is the quencher coefficient, and  $c = [\text{CPT}]$ .
